# Supplementary material for: Heterogenicity within the LPS Structure in Relation to the Chosen Genomic and Physiological Features of the Plant Pathogen Pectobacterium parmentieri
Source: MDPI journal article supplement (doi:10.3390/ijms23042077), 2022-02-14

## Heterogeneity within the LPS Structure in Relation to the Chosen Genomic and Physiological Features of the Plant Pathogen *Pectobacterium parmentieri*

Karolina Ossowska <sup>1</sup>, Agata Motyka-Pomagruk <sup>2</sup>, Natalia Kaczyńska <sup>2</sup>, Agnieszka Kowalczyk <sup>1</sup>, Wojciech Sledz <sup>2</sup>, Ewa Lojkowska <sup>2</sup> and Zbigniew Kaczyński <sup>1,\*</sup>

<sup>1</sup> Faculty of Chemistry, University of Gdansk, 63 Wita Stwosza, 80-308 Gdansk, Poland; karolinaoss@wp.pl (K.O.); agnieszka.kowalczyk@ug.edu.pl (A.K.)

<sup>2</sup> Intercollegiate Faculty of Biotechnology, University of Gdansk and Medical University of Gdansk, 58 Abrahama, 80-307 Gdansk, Poland; agata.motyka-pomagruk@ug.edu.pl (A.M.-P.); natalia.kaczynska@ug.edu.pl (N.K.); wojciech.sledz@biotech.ug.edu.pl (W.S.); ewa.lojkowska@biotech.ug.edu.pl (E.L.)

\* Correspondence: zbigniew.kaczynski@ug.edu.pl

Figure S1. The HSQC spectrum of the OPS isolated from *P. parmentieri* SCC3193

Figure S2. The TOCSY spectrum of the OPS isolated from *P. parmentieri* SCC3193

Figure S3. The COSY spectrum of the OPS isolated from *P. parmentieri* SCC3193

Figure S1. The HSQC spectrum of the OPS isolated from *P. parmentieri* SCC3193.

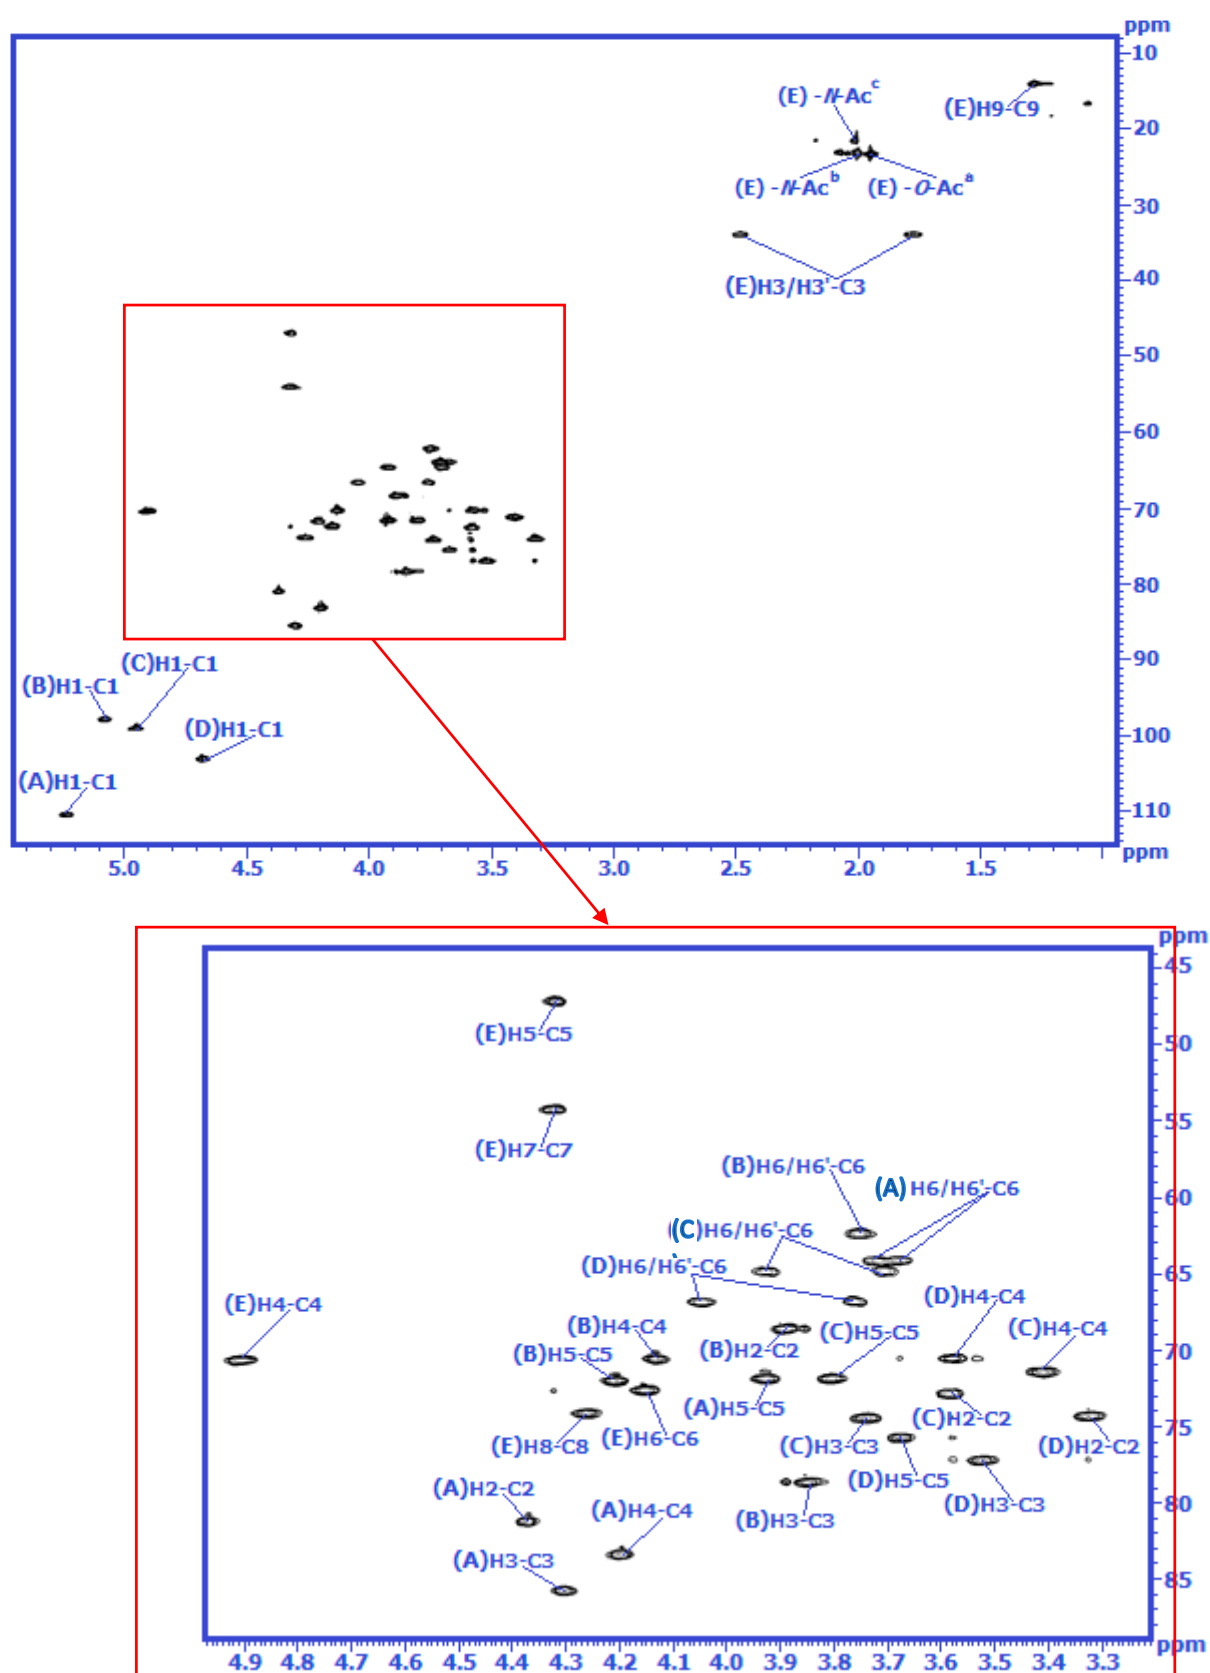

Figure S2. The TOCSY spectrum of the OPS isolated from *P. parmentieri* SCC3193.

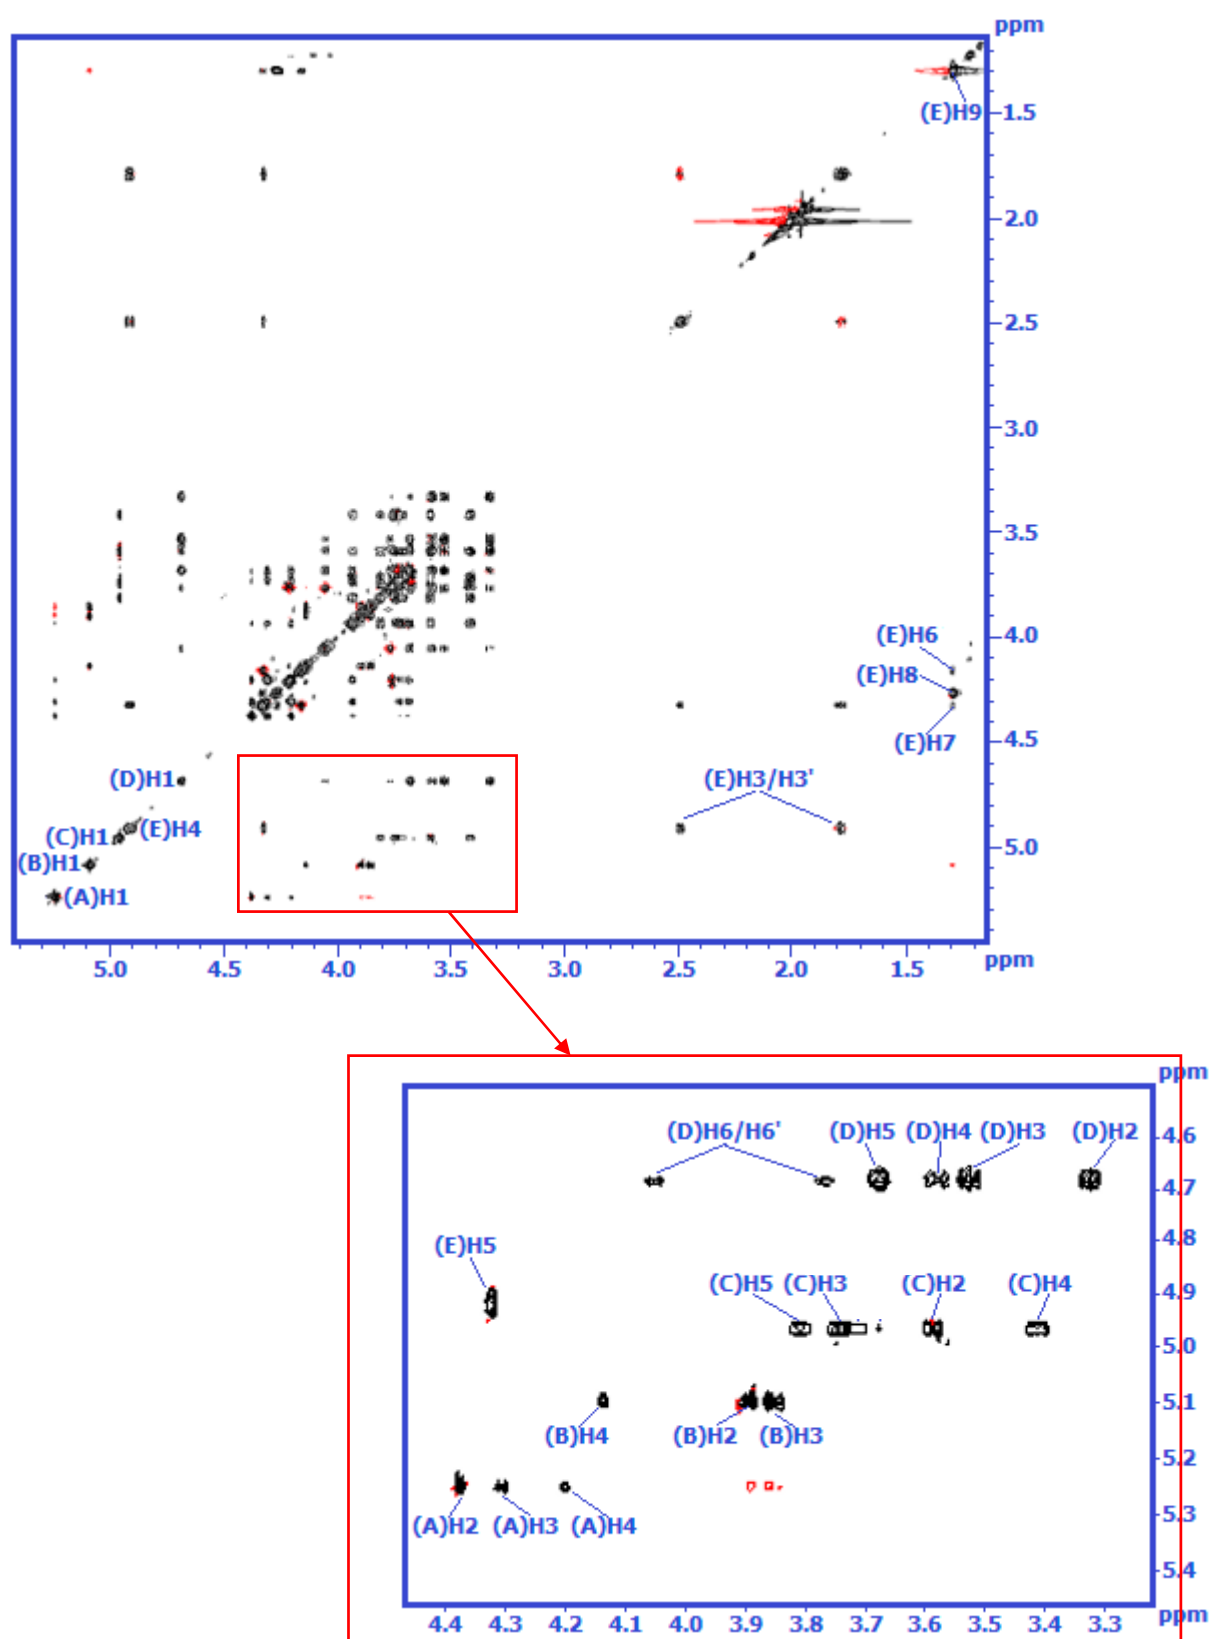

Figure S3. The COSY spectrum of the OPS isolated from *P. parmentieri* SCC3193.

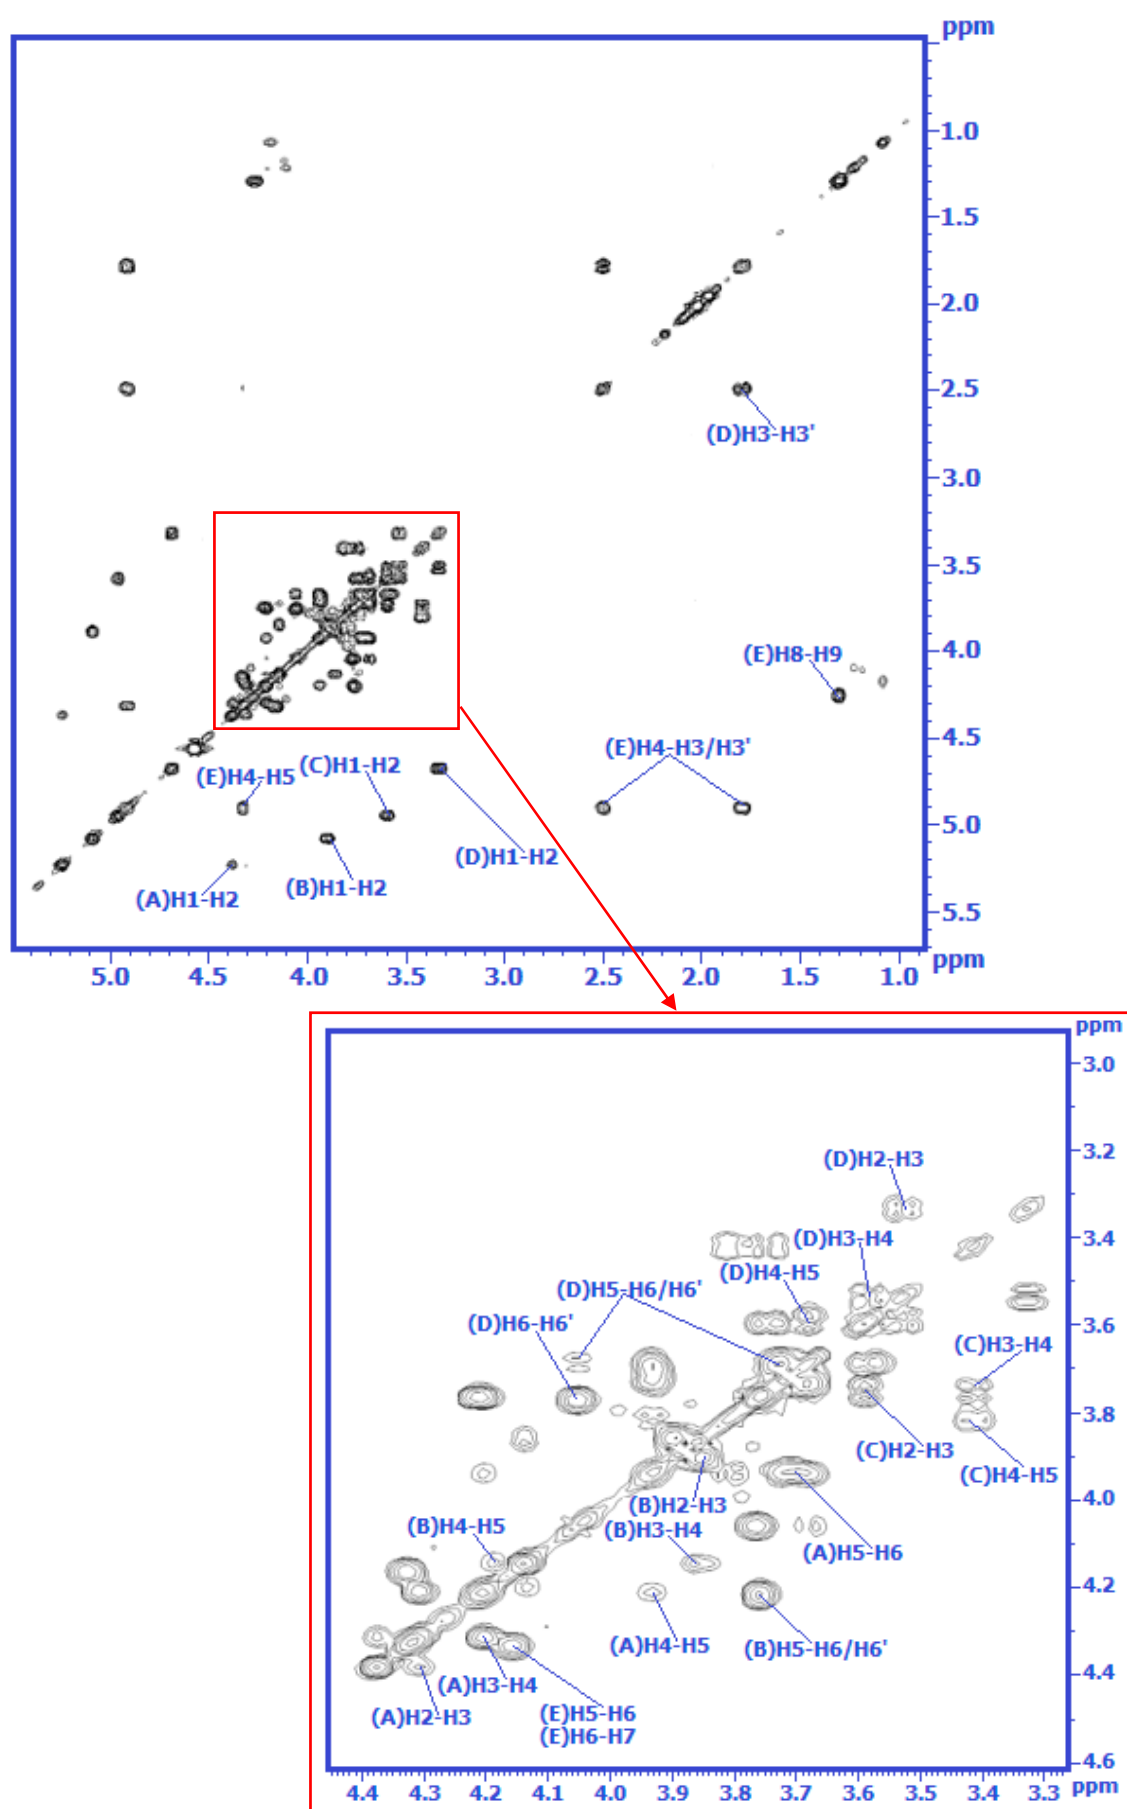

Supplement: s1 [file s1]
